# Supplementary material for: Facile synthesis of Pd nanostructures with enhanced electrocatalytic performance for ethanol oxidation by a bio-based method
Source: Royal Society of Chemistry journal article supplement (doi:10.1039/c6ra00560h), 2016-01-01
Supplement: c6ra00560h1.pdf [file c6ra00560h1.pdf]

## Supplementary Information

### Facile synthesis of Pd nanostructures with enhanced electrocatalytic performance for ethanol oxidation by a bio-based method

Guigui Pang, Muxue Sun, Peng Liu, Li Hou, Faming Gao\*

Key Laboratory of Applied Chemistry, Department of Applied Chemistry, Yanshan University, Qinhuangdao 066004, P. R. China.

\* Corresponding Author E-mail: fmgao@ysu.edu.cn. Phone: 86 335 8387552. Fax: 86 335 8061569

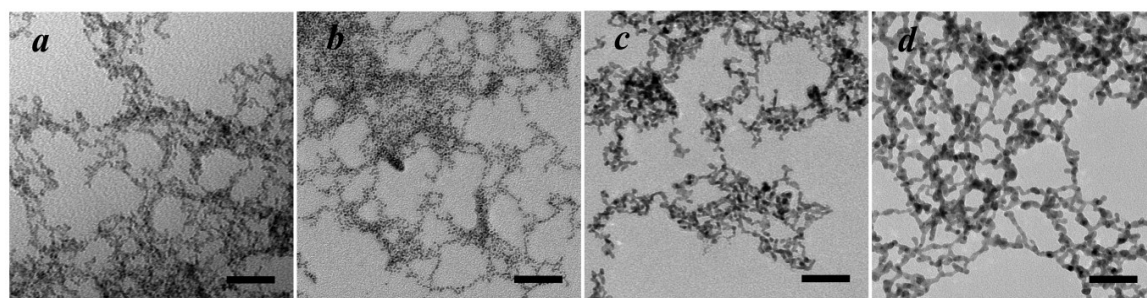

**Figure S1.** TEM images for time-dependent morphology evolution of the Pd nanowire networks at (a) 0 min (before adding  $\text{NaBH}_4$ ), (b) 1 min (after adding  $\text{NaBH}_4$ ), (c) 5 min and (d) 10 min. All the scale bars present 50 nm.

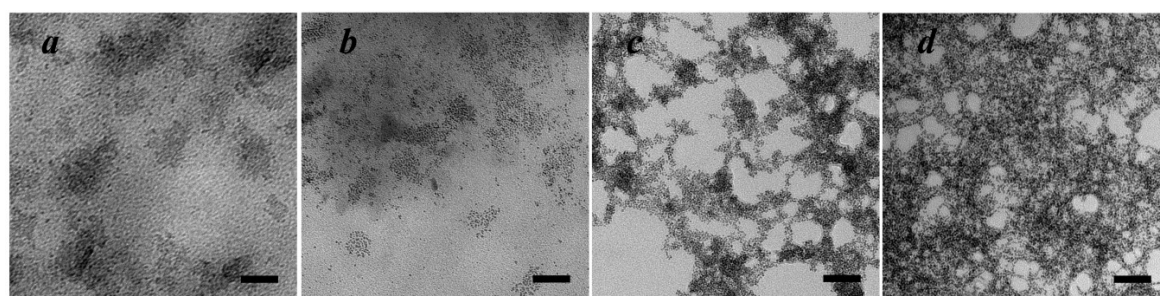

**Figure S2.** TEM images for time-dependent morphology evolution of the Pd nanoparticles at (a) 0 min (before adding  $\text{NaBH}_4$ ), (b) 1 min (after adding

NaBH<sub>4</sub>), (c)5 min and (d)10min. All the scale bars present 50 nm.

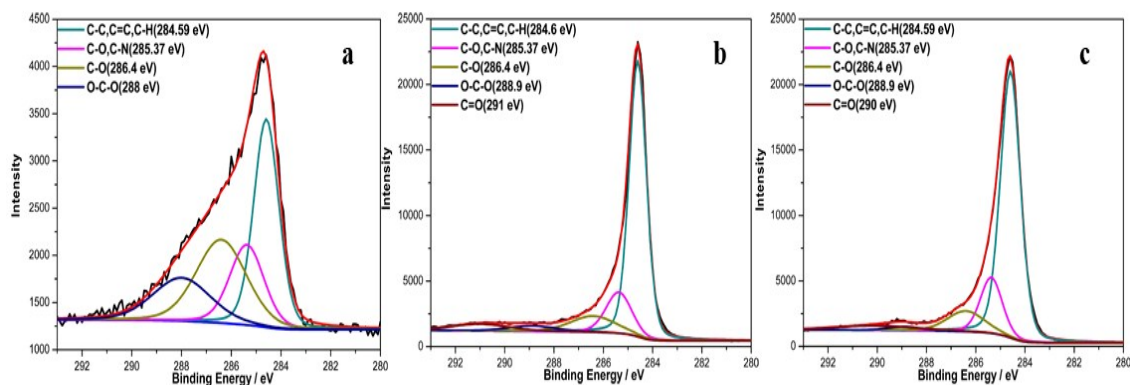

**Figure S3.** C1s spectra of PdNWs(a), PdNW/MWCNT(b) and PdNW/CB

(c).

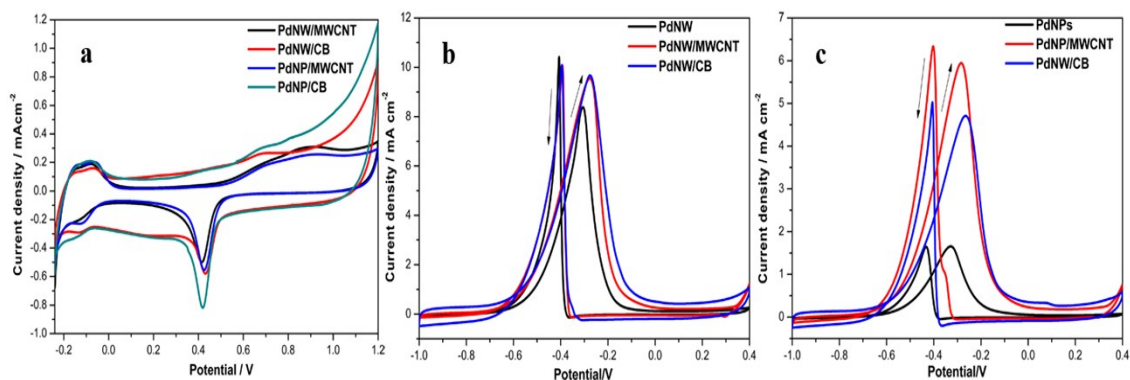

**Figure S4.** The comparison of the electrochemical performance of carbon-supported materials: CVs obtained in N<sub>2</sub>-purged 0.5 M H<sub>2</sub>SO<sub>4</sub> (a) specific activity of PdNWs, PdNW/MWCNT and PdNW/CB (b) and specific activity of PdNPs, PdNP/MWCNT and PdNP/CB.
